# Supplementary material
Source: ML conference proceedings conference paper supplement (https://proceedings.neurips.cc/paper_files/paper/2021/hash/28ce9bc954876829eeb56ff46da8e1ab-Abstract.html)
Supplement: Supplementary file 1 [file 28ce9bc954876829eeb56ff46da8e1ab-Supplemental.pdf]

---

# Differentially Private n-gram Extraction: Supplementary Materials

---

**Kunho Kim**

Microsoft  
kuki@microsoft.com

**Sivakanth Gopi**

Microsoft Research  
sigopi@microsoft.com

**Janardhan Kulkarni**

Microsoft Research  
jakul@microsoft.com

**Sergey Yekhanin**

Microsoft Research  
yekhanin@microsoft.com

## A A scalable algorithm for DPNE

In this section, we will present a more scalable and faster version of Algorithm 1. The main observation is that we never actually need to explicitly calculate all the valid  $k$ -grams  $V_k = (S_1 \times S_{k-1}) \cap (S_{k-1} \times S_1)$ , since this set can be prohibitively big. Instead, we will use the fact that checking membership in  $V_k$  is easy and we can also sample from  $V_k$  relatively efficiently.

---

**Algorithm 1:** Algorithm for differentially private ngram extraction (Faster and Scalable Version)

---

**Input:** A set of  $n$  users where each user  $i$  has some subset  $W_i^k$  of  $k$ -grams.

$T$ : maximum length of ngrams to be extracted

$\Delta_1, \Delta_2, \dots, \Delta_T$ : maximum contribution parameters

$\rho_1, \rho_2, \dots, \rho_T$ : Threshold parameters

$\sigma_1, \sigma_2, \dots, \sigma_T$ : Noise parameters.

$p$ : Sampling probability.

**Output:**  $S_1, S_2, \dots, S_T$  where  $S_k$  is a set of  $k$ -grams

// Run DPSU to learn 1-grams

$S_1 \leftarrow$  Run Algorithm 5 (DPSU) using  $\Delta_1, \rho_1, \sigma_1$  to get a set of 1-grams;

$V_1 \leftarrow S_1$ ;

// Iteratively learn  $k$ -grams

**for**  $k = 2$  **to**  $T$  **do**

$\#V_k \leftarrow$  EstimateValidKgrams( $S_1, S_{k-1}, p$ ); // Estimate valid  $k$ -grams

    Set  $\rho_k$  using  $|S_{k-1}|, \#V_k$ ;

    // Build a weighted histogram using Weighted Gaussian policy

$H_k \leftarrow$  Empty dictionary where any key which is inserted is initialized to 0;

**for**  $i = 1$  **to**  $n$  **do**

$U_i \leftarrow$  PruneInvalid( $W_i^k, S_1, S_{k-1}$ ); // Prune invalid ngrams

        // Limit user contributions

**if**  $|U_i| > \Delta_k$  **then**

$U_i \leftarrow$  Randomly choose  $\Delta_k$  items from  $U_i$ ;

**for**  $u$  in  $U_i$  **do**

$H_k[u] \leftarrow H_k[u] + \frac{1}{\sqrt{|U_i|}}$ ;

    // Add noise to  $H_k$  and output  $k$ -grams which cross the threshold  $\rho_k$

$S_k = \{\}$  (empty set);

**for**  $u \in H_k$  **do**

**if**  $H_k[u] + N(0, \sigma_k^2) > \rho_k$  **then**

$S_k \leftarrow S_k \cup \{u\}$ ;

    // Add spurious  $k$ -grams from  $V_k \setminus \text{supp}(H_k)$  with probability

$\Pr[N(0, \sigma_k^2) > \rho_k] = \Phi(-\rho_k/\sigma_k)$

$B_k = \text{Binomial}(\#V_k - |\text{supp}(H_k)|, \Phi(-\rho_k/\sigma_k))$ ; // # Spurious  $k$ -grams we need to  
    add to  $S_k$

$Sp_k \leftarrow \{\}$ ;

// Spurious  $k$ -grams

**while**  $|Sp_k| < B_k$  **do**

        Sample random  $x \sim S_1$  and  $w \sim S_{k-1}$  uniformly and independently;

        Let  $w = yz$  where  $z \in S_1$ ;

**if**  $xy \in S_{k-1}$  and  $z \in S_1$  and  $w \notin (Sp_k \cup \text{supp}(H_k))$  **then**

$Sp_k \leftarrow w \cup Sp_k$ ;

$S_k \leftarrow S_k \cup Sp_k$ ; // Add the spurious  $k$ -grams to the  $k$ -grams extracted from  
    users

Output  $S_1, S_2, \dots, S_T$ ;

---

---

**Algorithm 2: EstimateValidKgrams:** Algorithm for estimating number of valid  $k$ -grams

---

**Input:**  $S_1$ : Set of extracted 1-grams,  $S_{k-1}$ : Set of extracted  $(k-1)$ -grams,  $p$ : Sampling probability

**Output:** An estimate  $\widetilde{\#V}_k$  for the number of valid  $k$ -grams  $|V_k| = |(S_1 \times S_{k-1}) \cap (S_{k-1} \times S_1)|$   
 $N \leftarrow \lceil p|S_1||S_{k-1}| \rceil$ ;

$count \leftarrow 0$ ;

**for**  $i = 1$  **to**  $N$  **do**

    Sample random  $x \sim S_1$  and  $w \sim S_{k-1}$  uniformly and independently;

    Let  $w = yz$  where  $z \in S_1$ ;

**if**  $xy \in S_{k-1}$  and  $z \in S_1$  **then**

$count = count + 1$ ;

$\widetilde{\#V}_k \leftarrow \lceil count/p \rceil$ ;

Output  $\widetilde{\#V}_k$ ;

---

---

**Algorithm 3: CheckValidity:** Check validity of a  $k$ -gram

---

**Input:**  $w$ : Any  $k$ -gram with  $k \geq 2$ ,  $S_1$ : Set of extracted 1-grams,  $S_{k-1}$ : Set of extracted  $(k-1)$ -grams

**Output:** True if  $w$  is valid i.e.  $w \in V_k = (S_1 \times S_{k-1}) \cap (S_{k-1} \times S_1)$ , else False

Let  $w = xyz$  where  $x, z$  are 1-grams;

**if**  $x, z \in S_1$  and  $xy, yz \in S_{k-1}$  **then**

    Output True;

**else**

    Output False;

---

---

**Algorithm 4: PruneInvalid:** Prune invalid  $k$ -grams from a given set of  $k$ -grams

---

**Input:**  $W$ : Any set of  $k$ -grams with  $k \geq 2$ ,  $S_1$ : Set of extracted 1-grams,  $S_{k-1}$ : Set of extracted  $(k-1)$ -grams

**Output:**  $W \cup V_k$  where  $V_k = (S_1 \times S_{k-1}) \cap (S_{k-1} \times S_1)$

$\widehat{W} \leftarrow \{\}$ ;

**for**  $w$  **in**  $W$  **do**

**if**  $CheckValidity(w, S_1, S_{k-1})$  **then**

$\widehat{W} \leftarrow w \cup \widehat{W}$ ;

Output  $\widehat{W}$ ;

---

## B Differentially Private Set Union (DPSU) Algorithm

---

**Algorithm 5:** Algorithm for extracting 1-grams using DPSU

---

**Input:** A set of  $n$  users where each user  $i$  has some subset  $W_i^1$  of 1-grams.

$\Delta_1$ : maximum contribution parameter

$\rho_1$ : Threshold parameter

$\sigma_1$ : Noise parameter

**Output:**  $S_1$ , a set of 1-grams

**for**  $i = 1$  **to**  $n$  **do**

$U_i \leftarrow W_i^1$ ;  
    **if**  $|U_i| > \Delta_1$  **then**  
         $U_i \leftarrow$  Randomly choose  $\Delta_1$  items from  $W_i$ ;  
    **for**  $u$  **in**  $U_i$  **do**  
         $H_1[u] \leftarrow H_1[u] + \frac{1}{\sqrt{|U_i|}}$ ;

$S_1 = \{\}$ ;

// empty set

$H_1 \leftarrow$  Empty dictionary where any key which is inserted is initialized to 0;

**for**  $u \in H_1$  **do**

**if**  $H_1[u] + N(0, \sigma_1^2) > \rho_1$  **then**  
         $S_1 \leftarrow S_1 \cup \{u\}$ ;

Output  $S_1$ ;

---
